# Supplementary material for: Covalently functionalized uniform amino-silica nanoparticles. Synthesis and validation of amine group accessibility and stability
Source: Royal Society of Chemistry journal article supplement (doi:10.1039/c9na00772e), 2020-01-01
Supplement: c9na00772e1.pdf [file c9na00772e1.pdf]

### Supporting Info

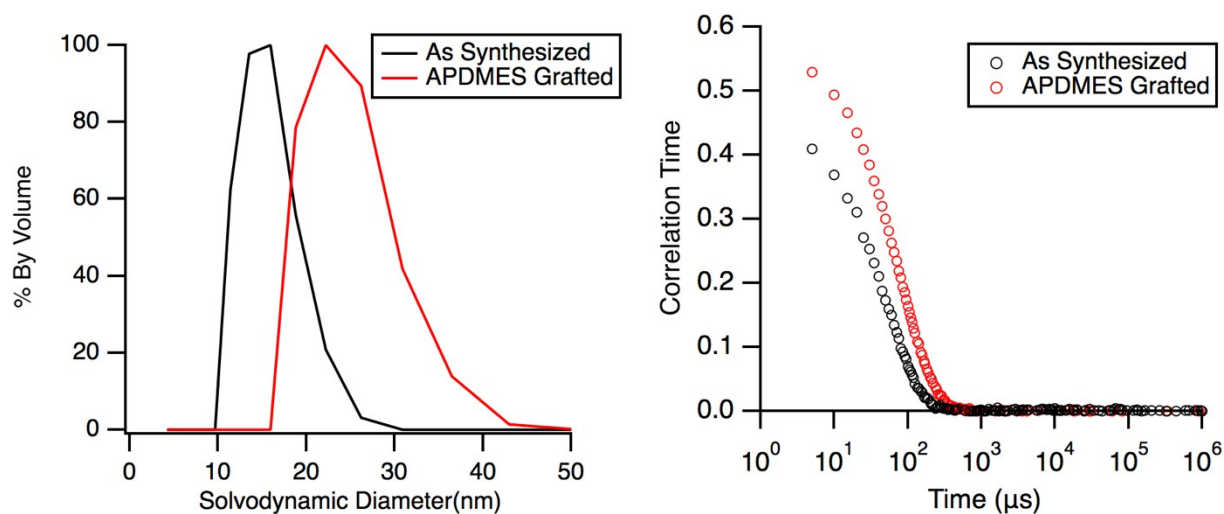

**Figure S1.** (a) DLS diameter and (b) corresponding correlogram comparing as synthesized pristine nanoparticles and APDMES grafted in water at 1 wt%.

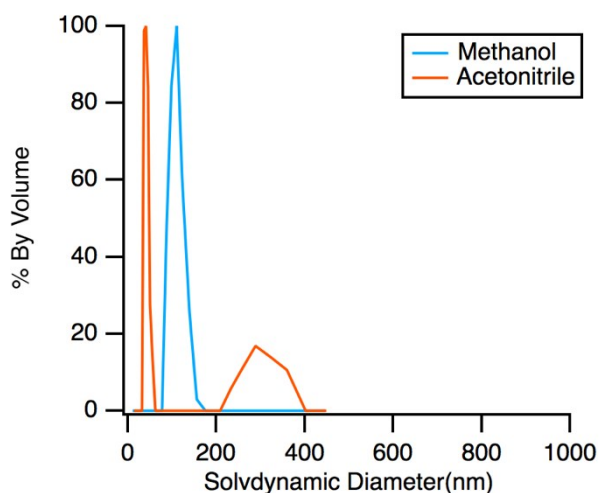

**Figure S2.** DLS results of particles transferred into methanol and acetonitrile. The measurements were completed directly after sonication.

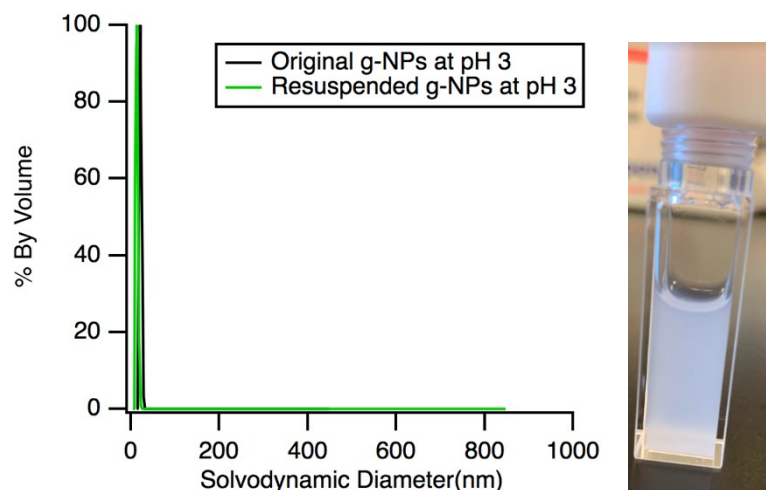

**Figure S3. (Left)** DLS of amine grafted nanoparticles at pH 3 compared to the particles after the pH was raised to 11 when flocculation occurred, then reduced back to pH 3 and resuspended with sonication. Axis shown to 1000 nm to show no aggregation. **(Right)** Image of particles flocculated at pH 11.

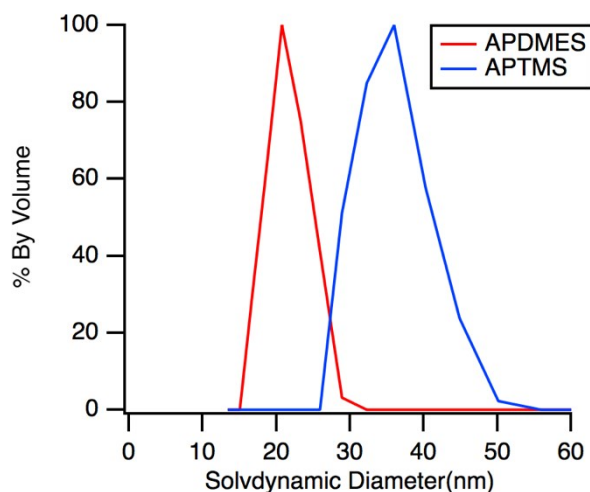

**Figure S4.** Comparison of diameter of particles grafted with the same molar amount of (3-aminopropyl)trimethoxysilane (APTMS) and (3-aminopropyl)dimethylethoxysilane (APDMES) in water, both at 1 wt%.

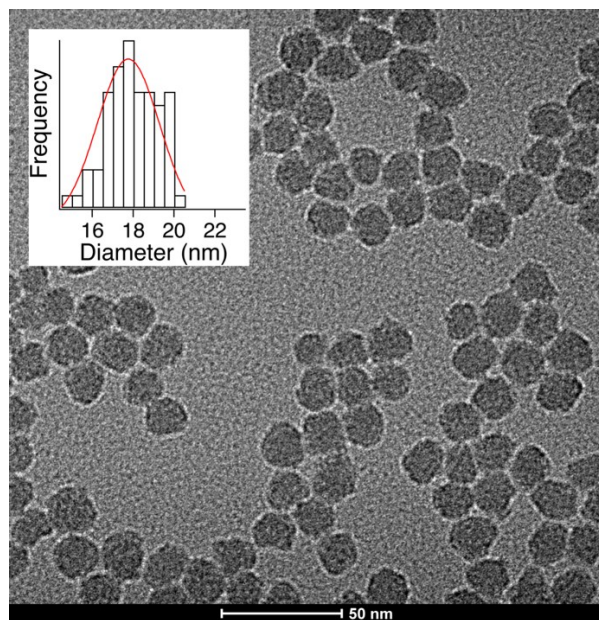

**Figure S5.** TEM micrograph with corresponding diameter distribution of g-NPs after a 30-day incubation period.

**Table S1.** Error of 5 runs of the same g-NP sample for DLS calculations.

| Sample   | Effective Diameter (nm) | Polydispersity |
|----------|-------------------------|----------------|
| 1        | 19.4                    | 0.291          |
| 2        | 15.6                    | 0.321          |
| 3        | 17                      | 0.274          |
| 4        | 16.2                    | 0.289          |
| 5        | 18.7                    | 0.242          |
| Avg.     | 17.4                    | 0.283          |
| Std Dev. | 1.5                     | 0.025          |

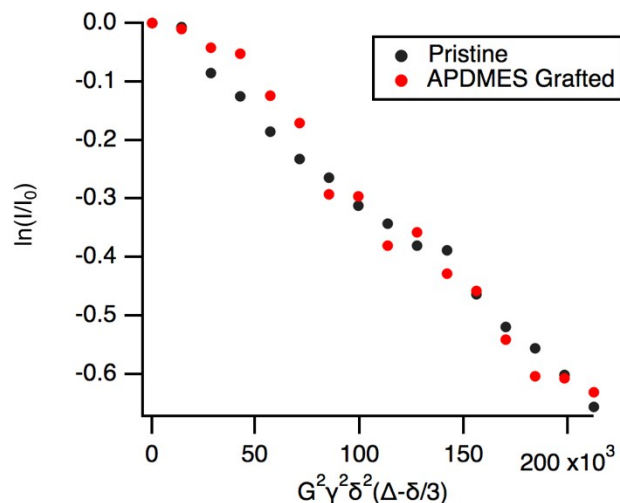

**Figure S6.** PFG-NMR gradient attenuation for pristine CMUG compared to in the presence of g-NP. The calculated diffusion coefficient for both were around  $320 \mu\text{m}^2/\text{s}$  with no significant differences. Acid:amine ratio is 1:1.

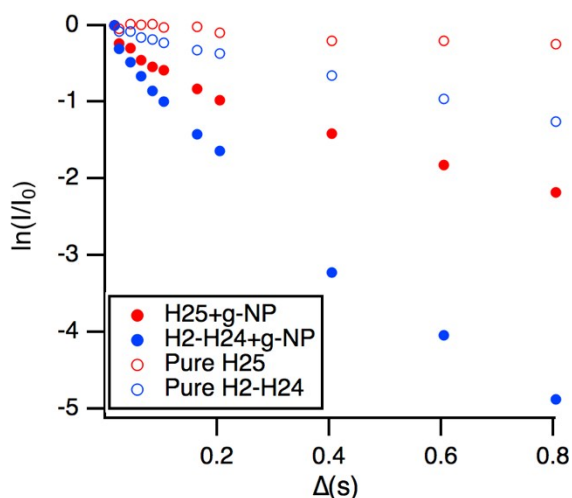

**Figure S7.**  $T_2$  decay comparing the terminal protons (H25) to the middle protons(H2-H24) of CMUG with and without grafted nanoparticles. Acid:amine ratio is 2:1. It can be observed that the middle protons have a much faster  $T_2$  and the initial linear region is very short as a result.

**Table S2.** Peak widths for all protons on CMUG with and without grafted nanoparticles.

|           |      | H1    | H2-H24 | H25  |
|-----------|------|-------|--------|------|
| FWHM (Hz) | Pure | 4.14  | 4.96   | 2.78 |
|           | g-NP | 15.62 | 12.16  | 7.79 |

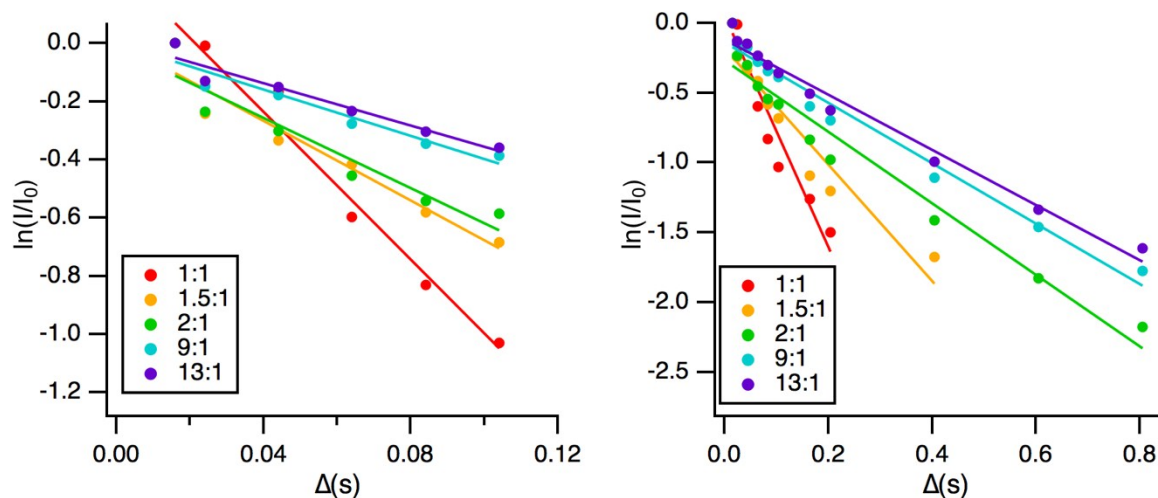

**Figure S8.** (a) Linear fit to  $T_2$  attenuation data under a delay time of 150 ms and (b) linear fit to  $T_2$  attenuation of all points.

**Table S3.** Calculated  $T_2$  values from linear fits under 150 ms delay time compared to full fits.

| Acid to<br>Amine | Calculated<br>$T_2$ /ms<br>Under 150 ms | Calculated<br>$T_2$ /ms<br>Full Fit |
|------------------|-----------------------------------------|-------------------------------------|
| 1 to 1           | 78                                      | 120                                 |
| 1.5 to 1         | 146                                     | 239                                 |
| 2 to 1           | 155                                     | 390                                 |
| 9 to 1           | 252                                     | 461                                 |
| 13 to 1          | 275                                     | 505                                 |
